# Supplementary material for: First total synthesis of cryptomoscatone F1
Source: Royal Society of Chemistry journal article supplement (doi:10.1039/c5ra03693c), 2015-01-01
Supplement: c5ra03693c1.pdf [file c5ra03693c1.pdf]

## Supporting Information

### First Total Synthesis of Cryptomoscatone F1

Atla Raju and Gowravaram Sabitha\*

*Natural Products Chemistry Division, CSIR-Indian Institute of Chemical Technology, Hyderabad  
500 007, India, Fax: +91-40-27160512. E-mail: gowravaramsr@yahoo.com; sabitha@iict.res.in*

|                                                                        |        |
|------------------------------------------------------------------------|--------|
| 1. <sup>1</sup> H NMR and <sup>13</sup> C NMR Spectra of All Compounds | 2 – 15 |
| 2. HPLC of compound <b>19</b>                                          | 16-17  |
| 3. NOESY spectrum of compound <b>6</b>                                 | 18     |

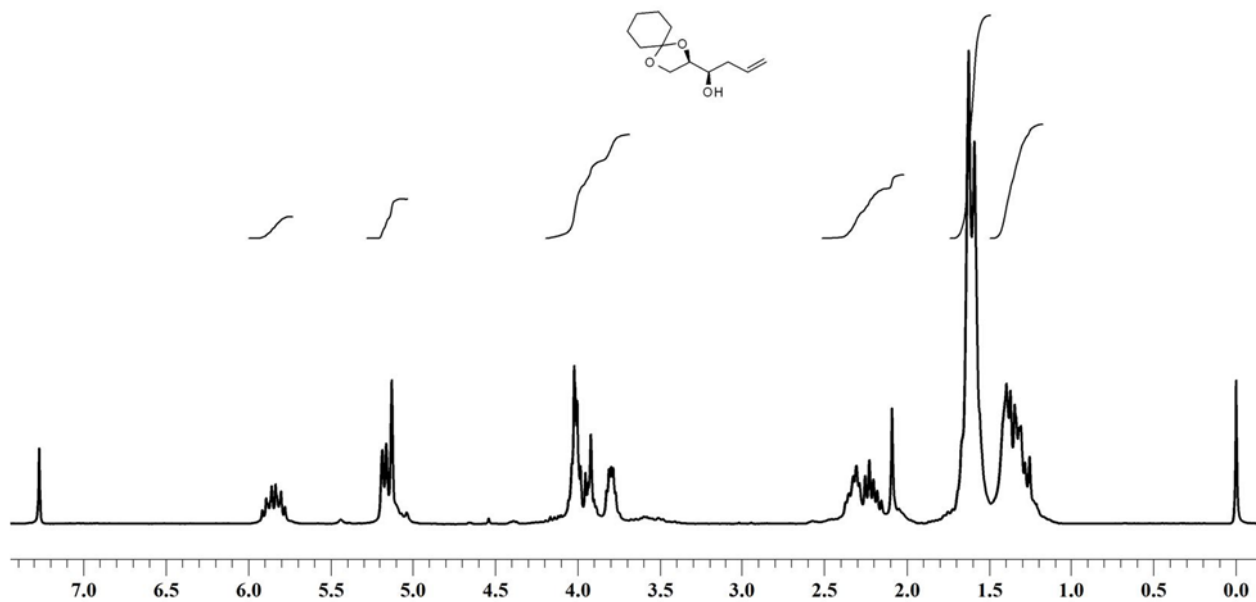

<sup>1</sup>H NMR OF COMPOUND 13

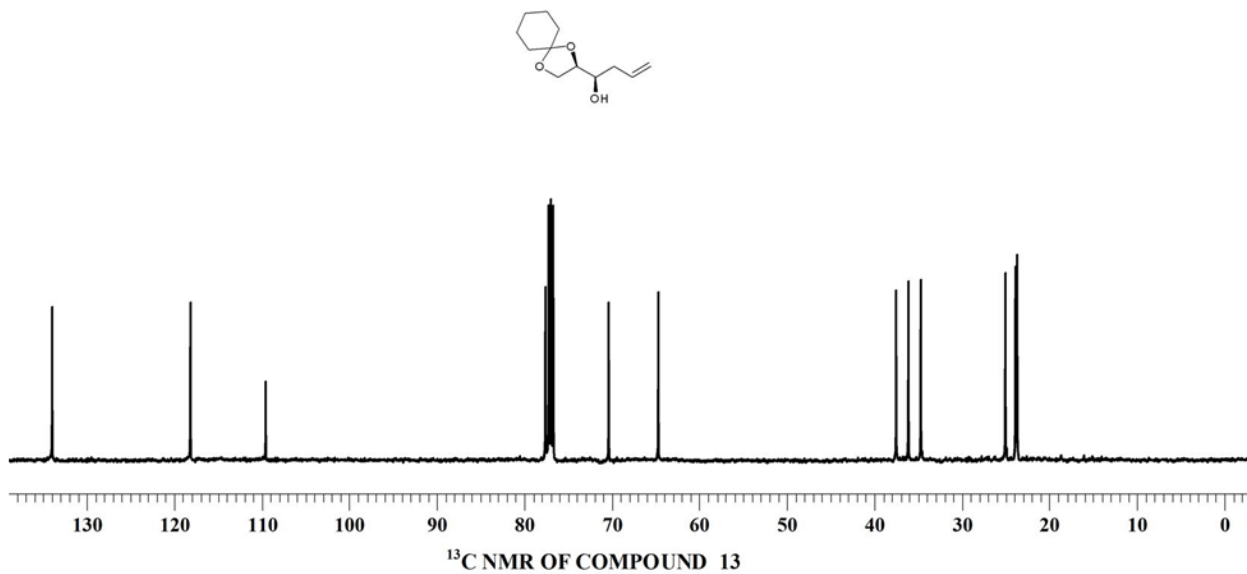

<sup>13</sup>C NMR OF COMPOUND 13

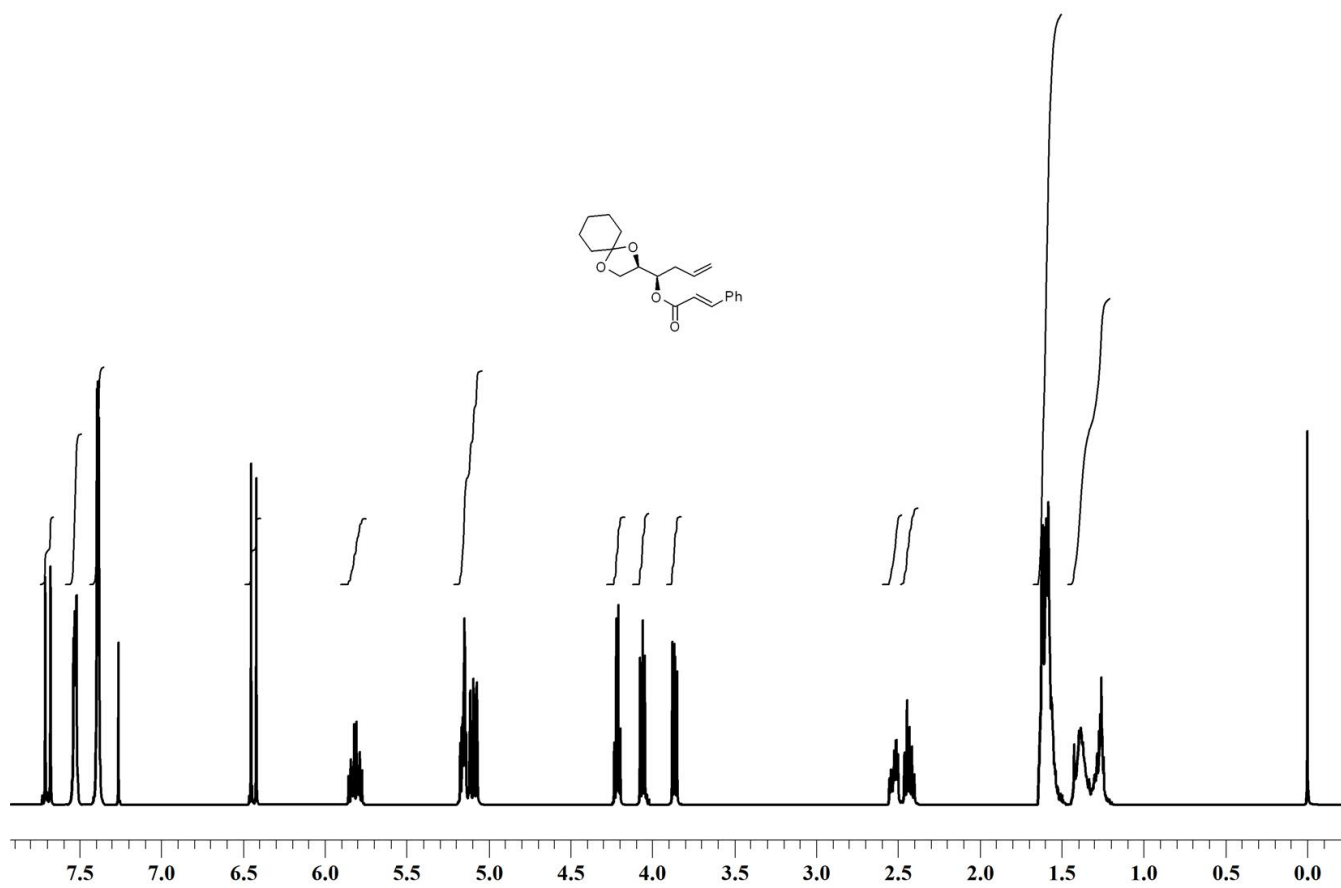

<sup>1</sup>H NMR OF COMPOUND 19

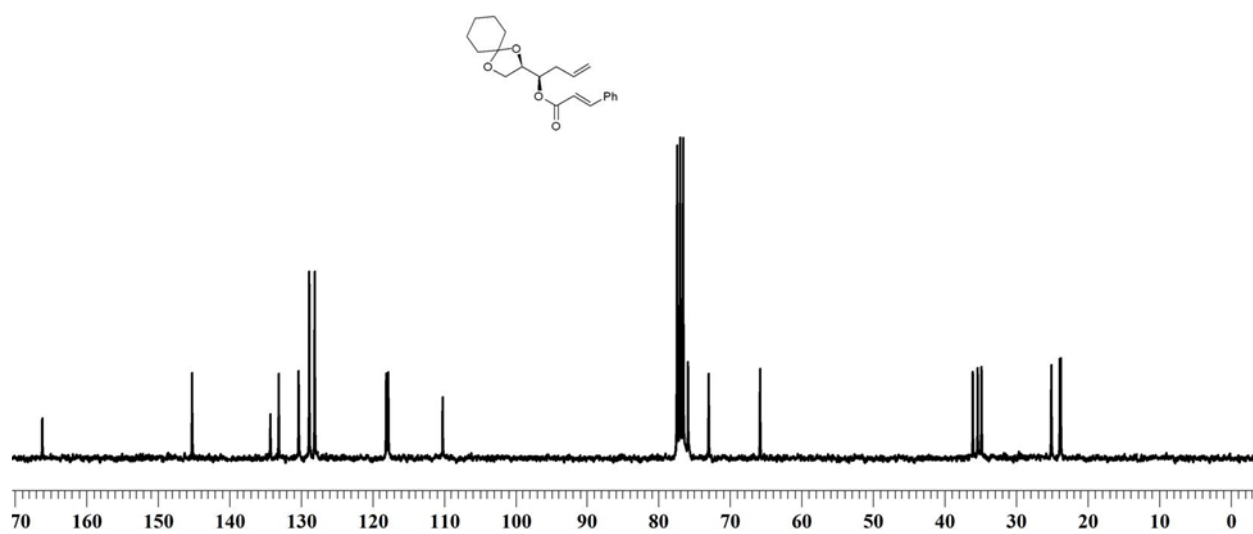

<sup>13</sup>C NMR OF COMPOUND 19

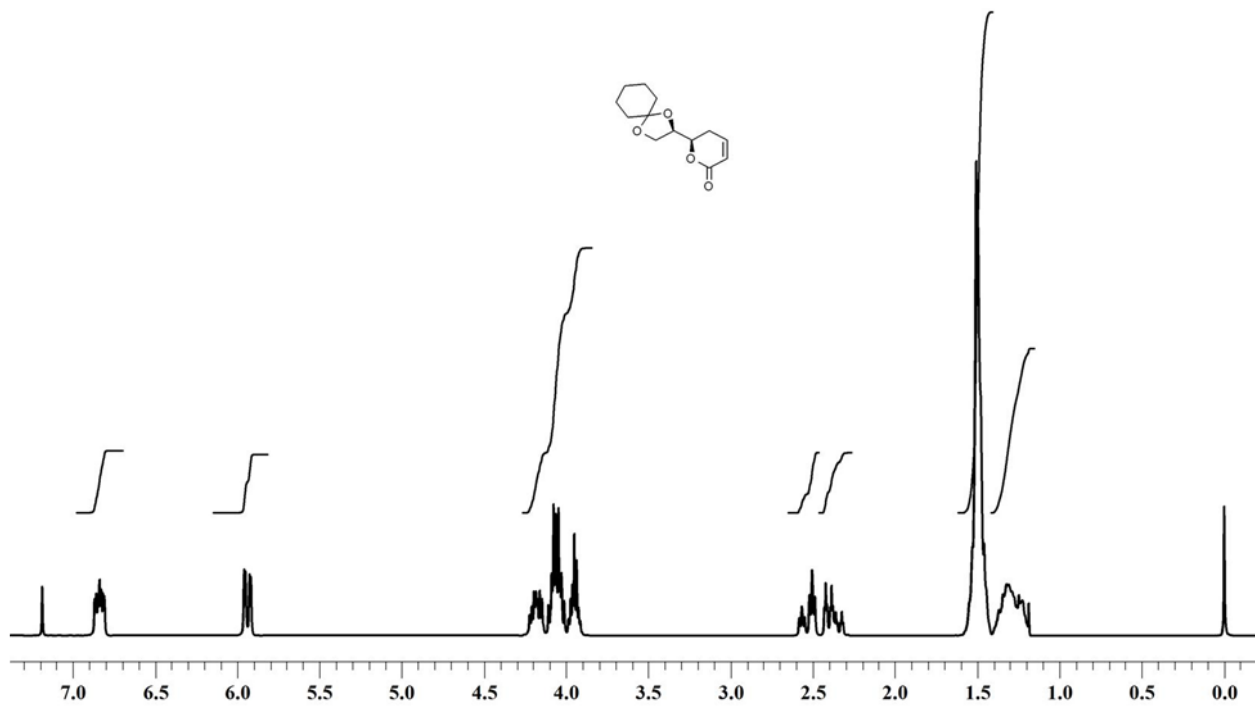

<sup>1</sup>H NMR OF COMPOUND 20

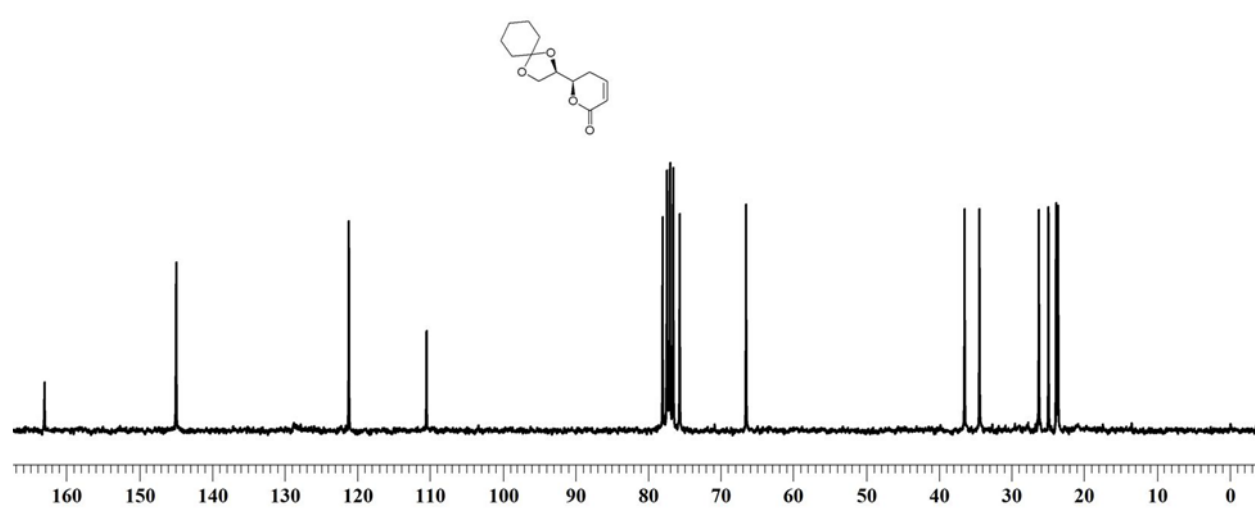

<sup>13</sup>C NMR OF COMPOUND 20

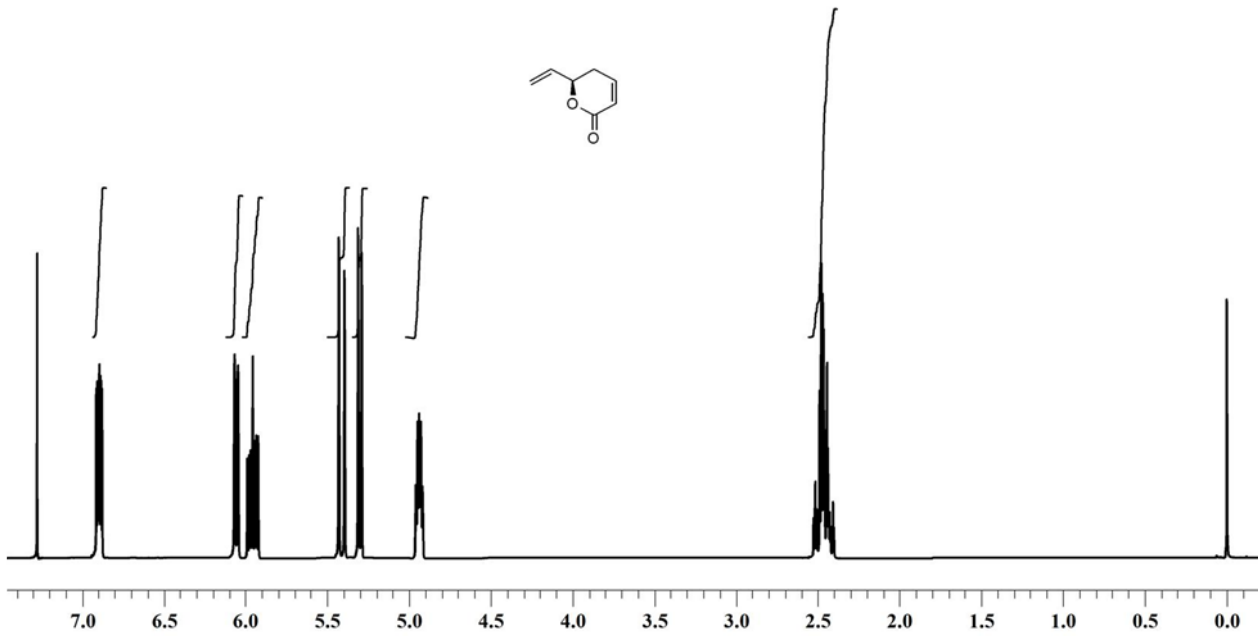

$^1\text{H}$  NMR OF COMPOUND 8

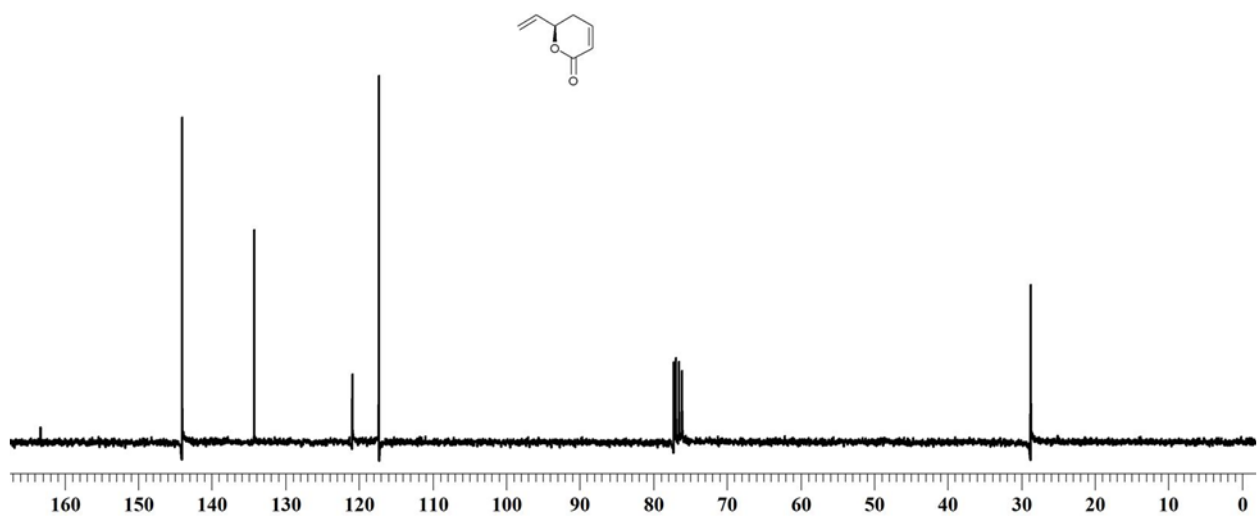

$^{13}\text{C}$  NMR OF COMPOUND 8

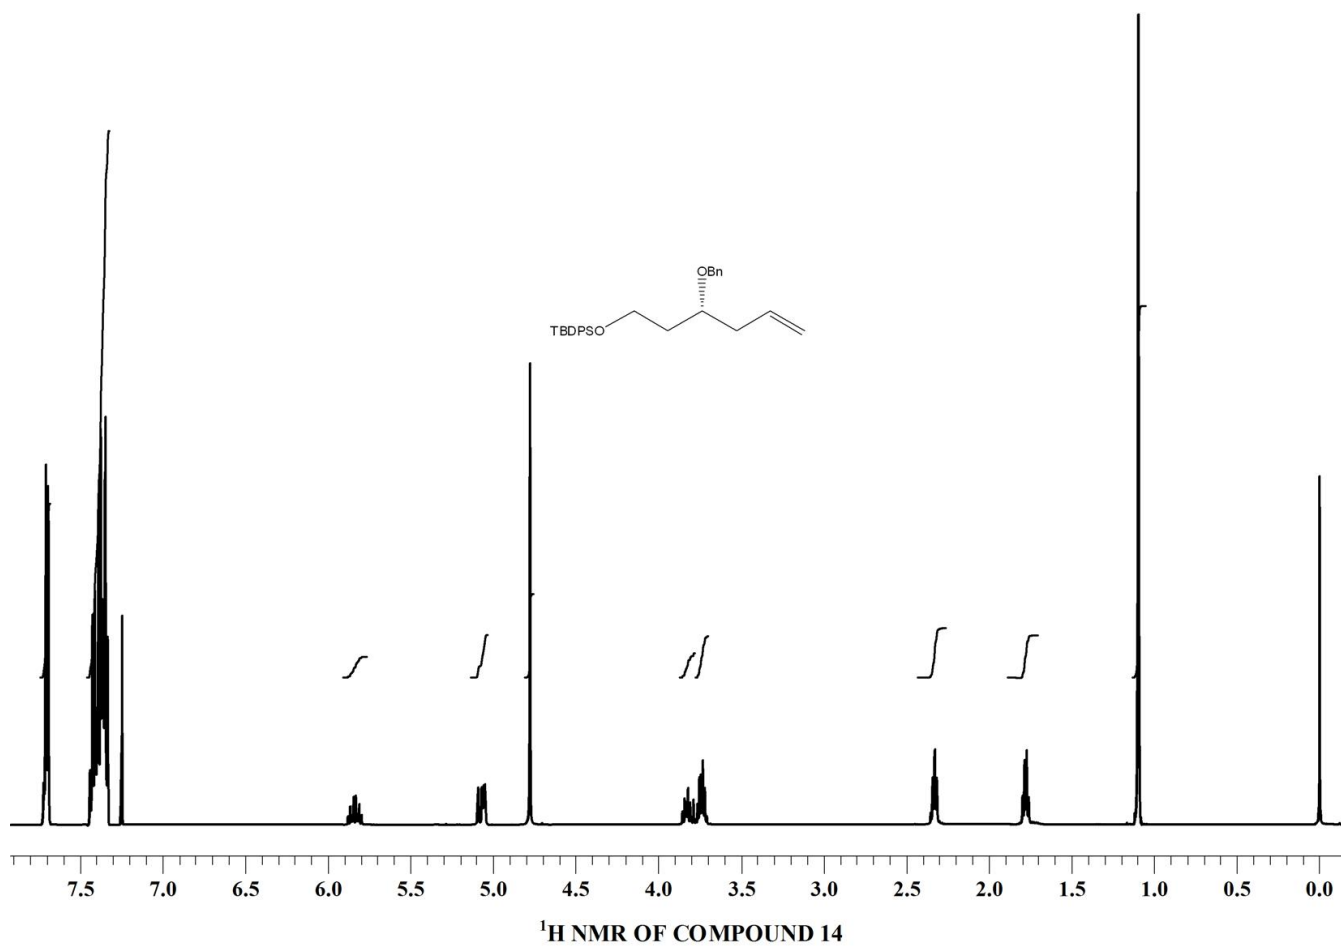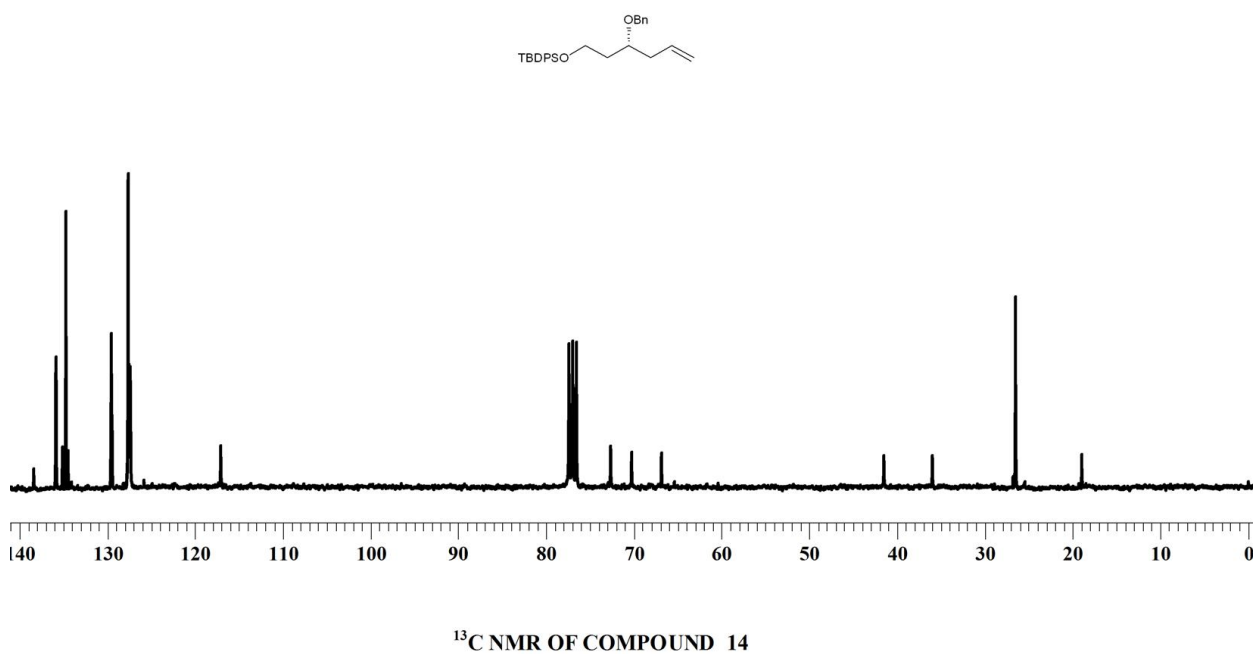

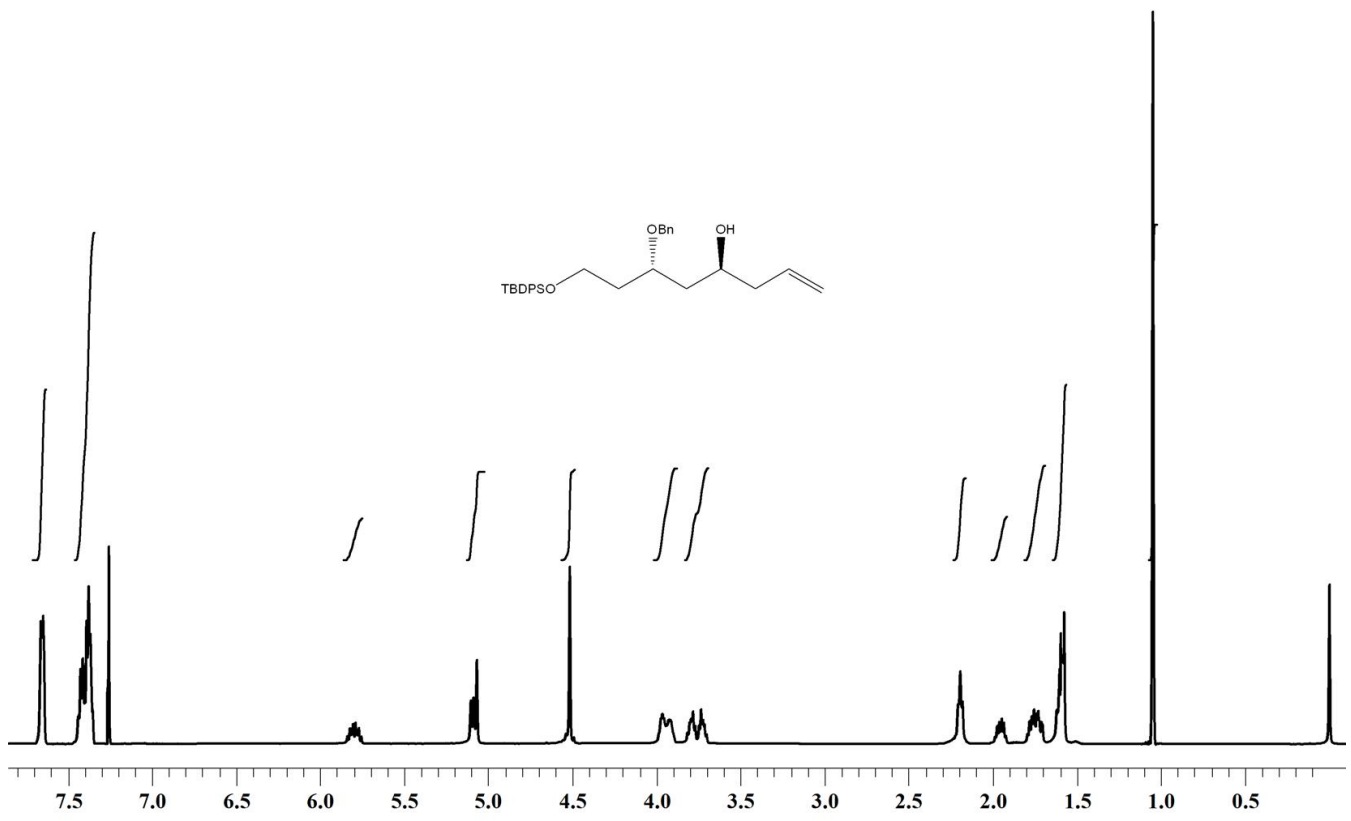

<sup>1</sup>H NMR OF COMPOUND 15

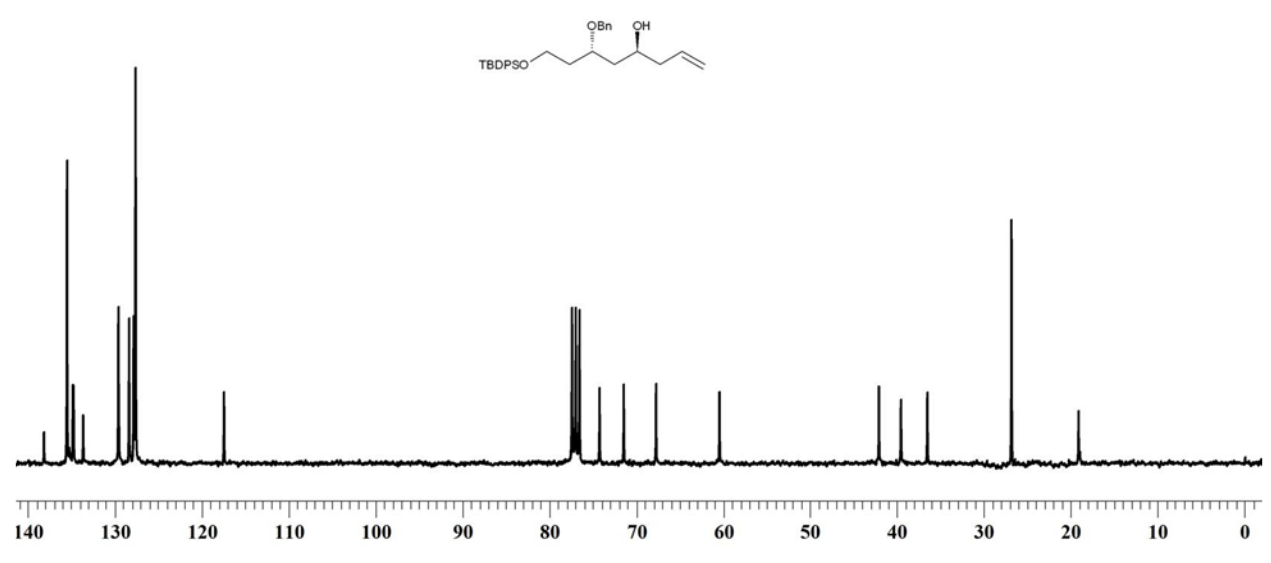

<sup>13</sup>C NMR OF COMPOUND 15

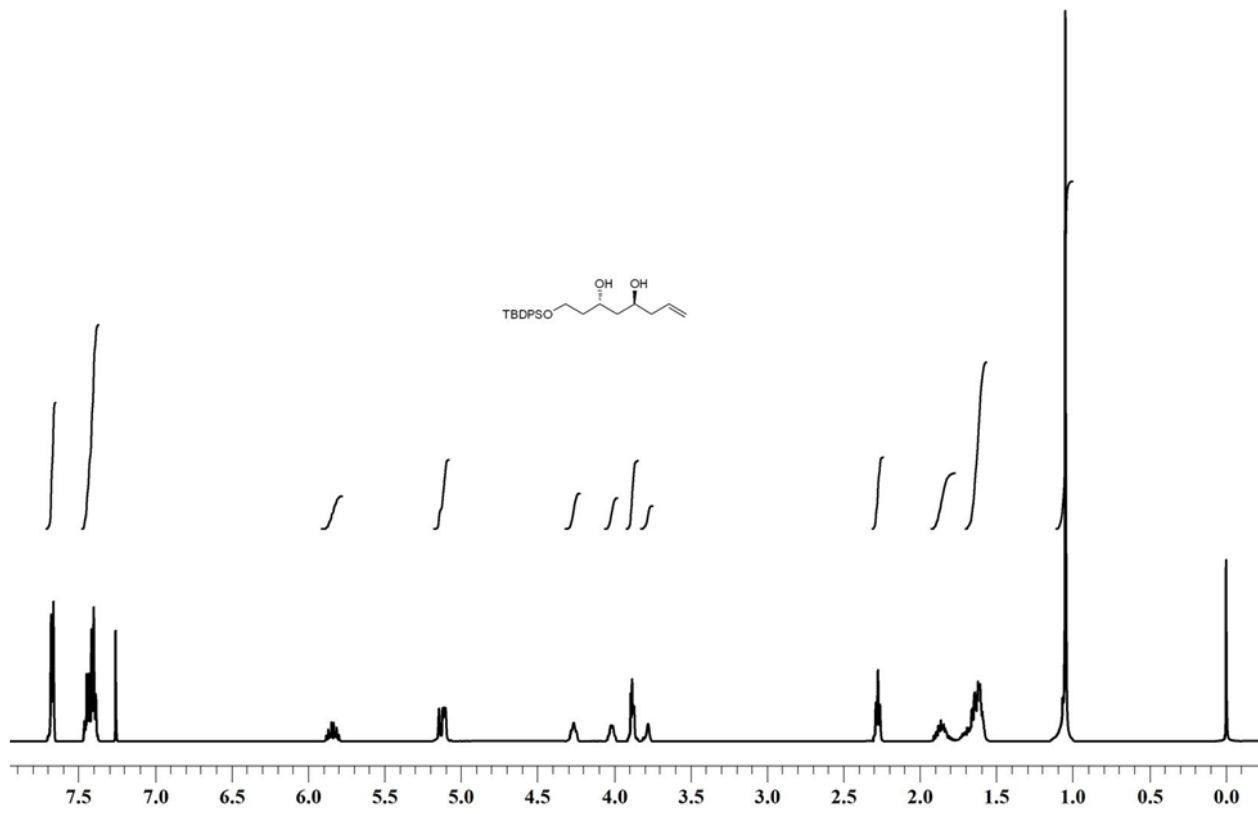

<sup>1</sup>H NMR OF COMPOUND 16

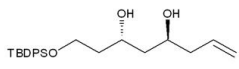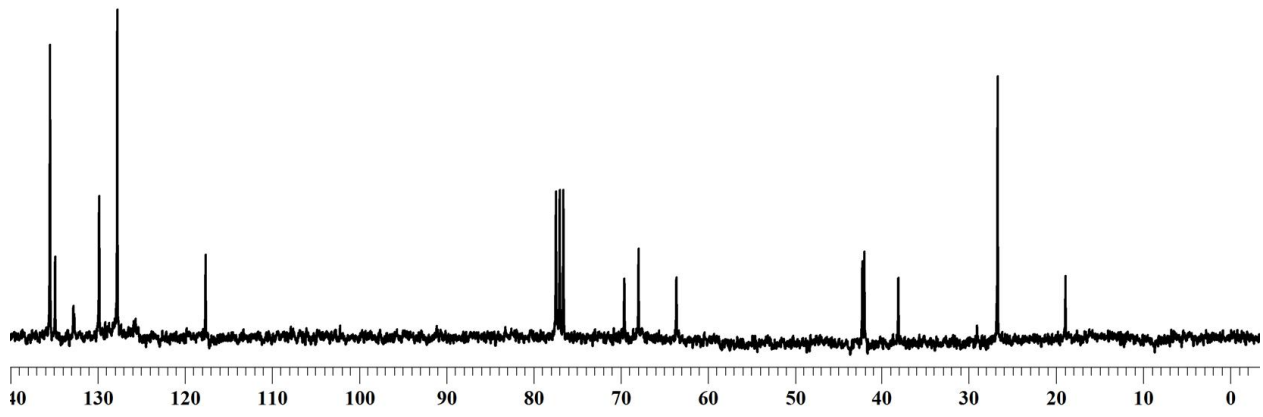

<sup>13</sup>C NMR OF COMPOUND 16



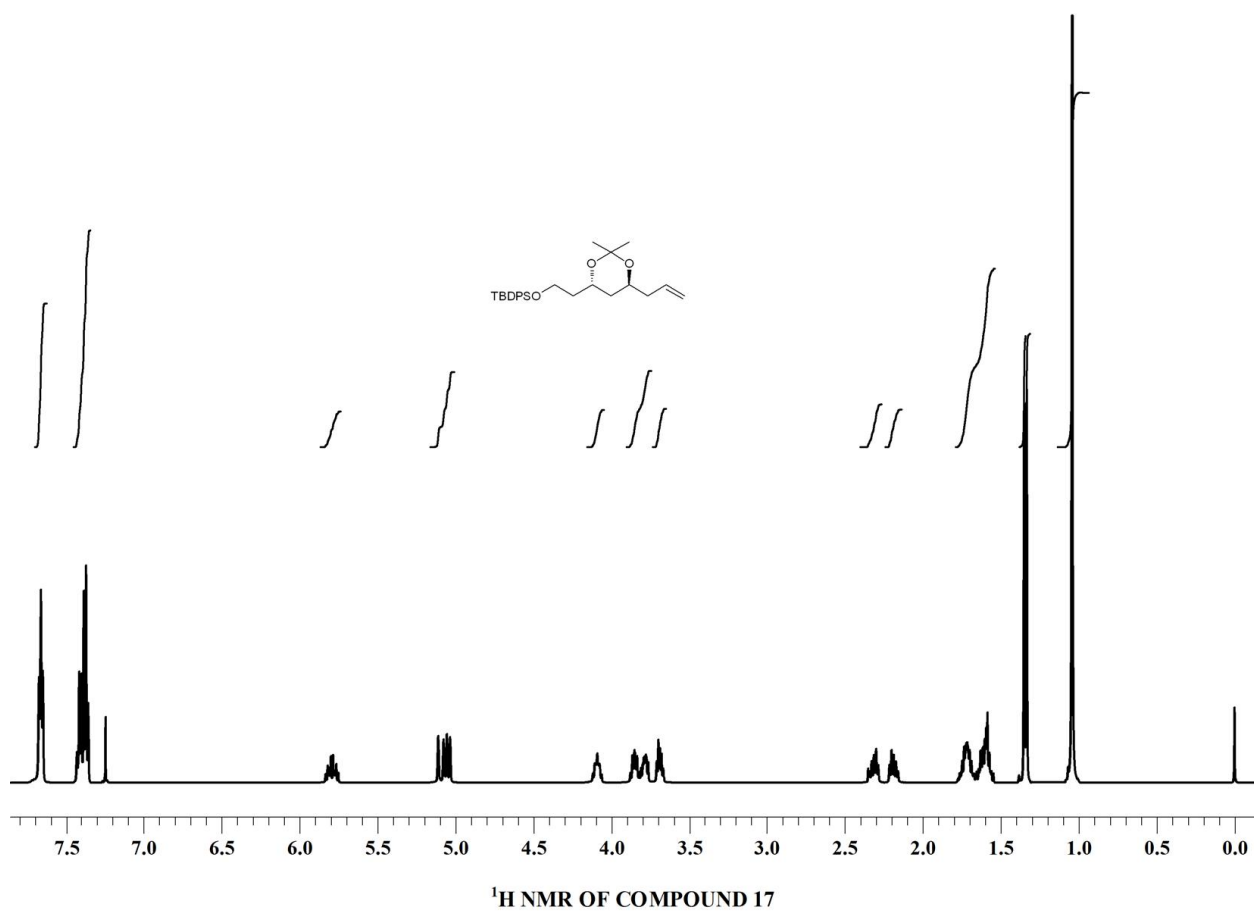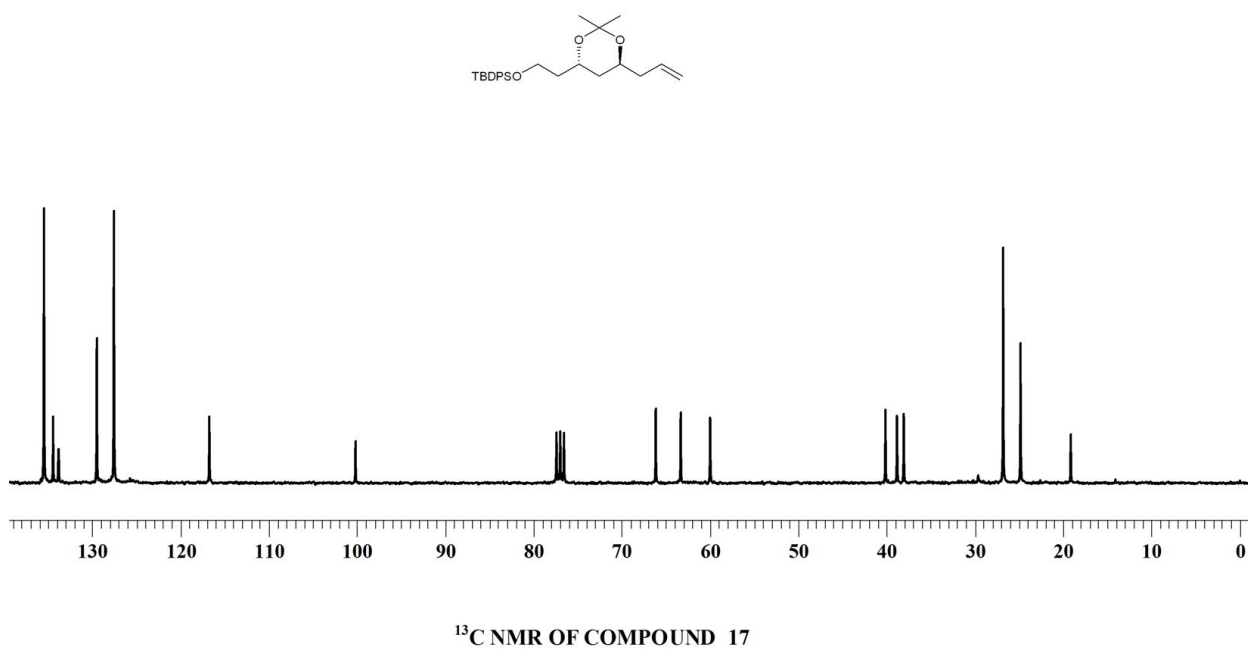

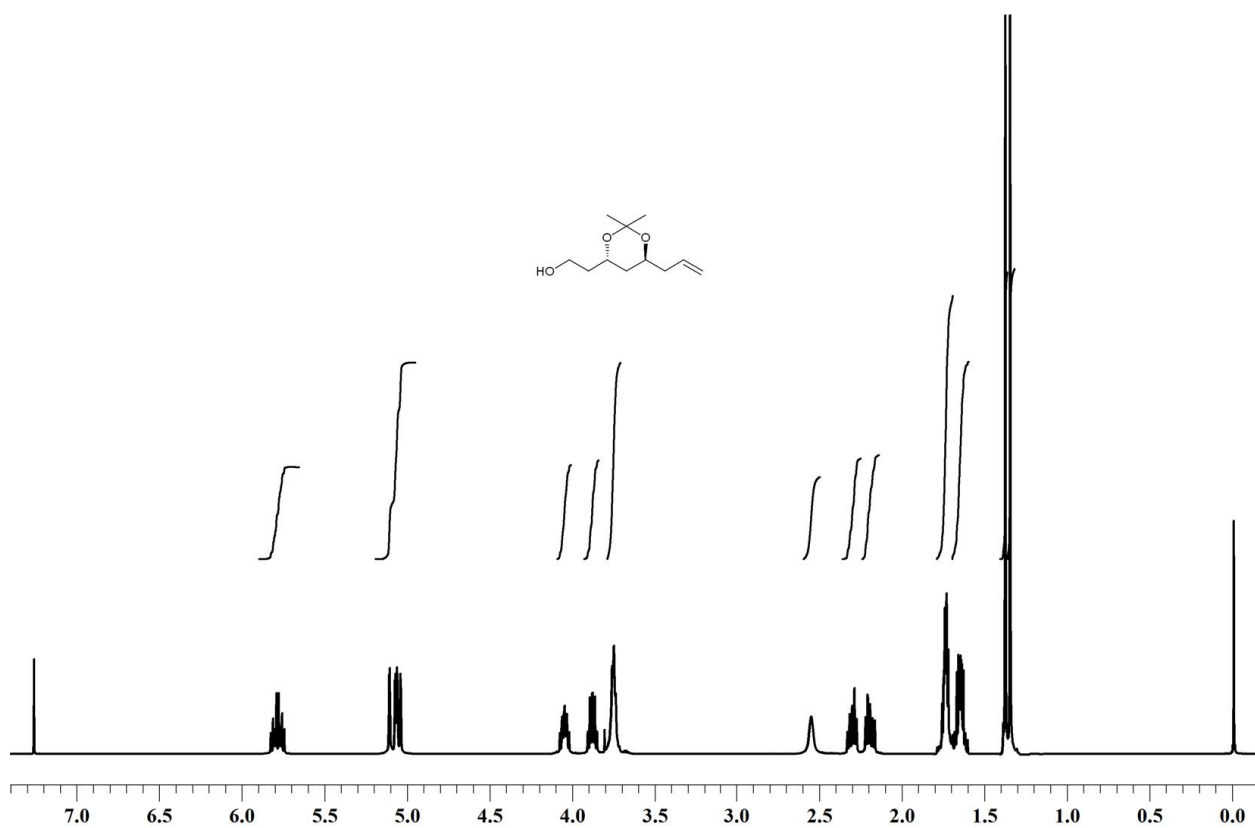

<sup>1</sup>H NMR OF COMPOUND 11

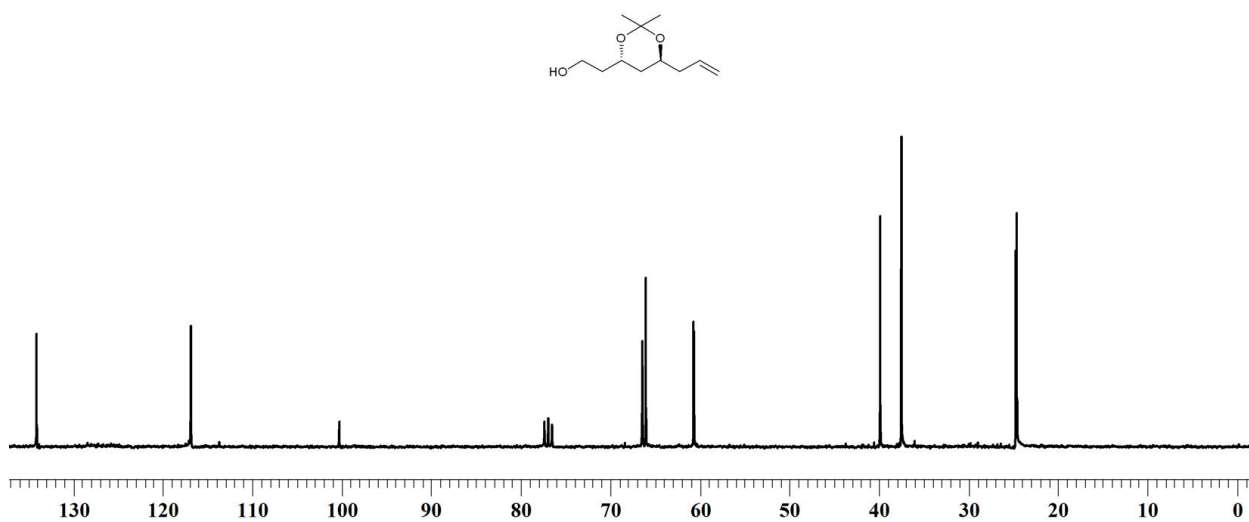

<sup>13</sup>C NMR OF COMPOUND 11

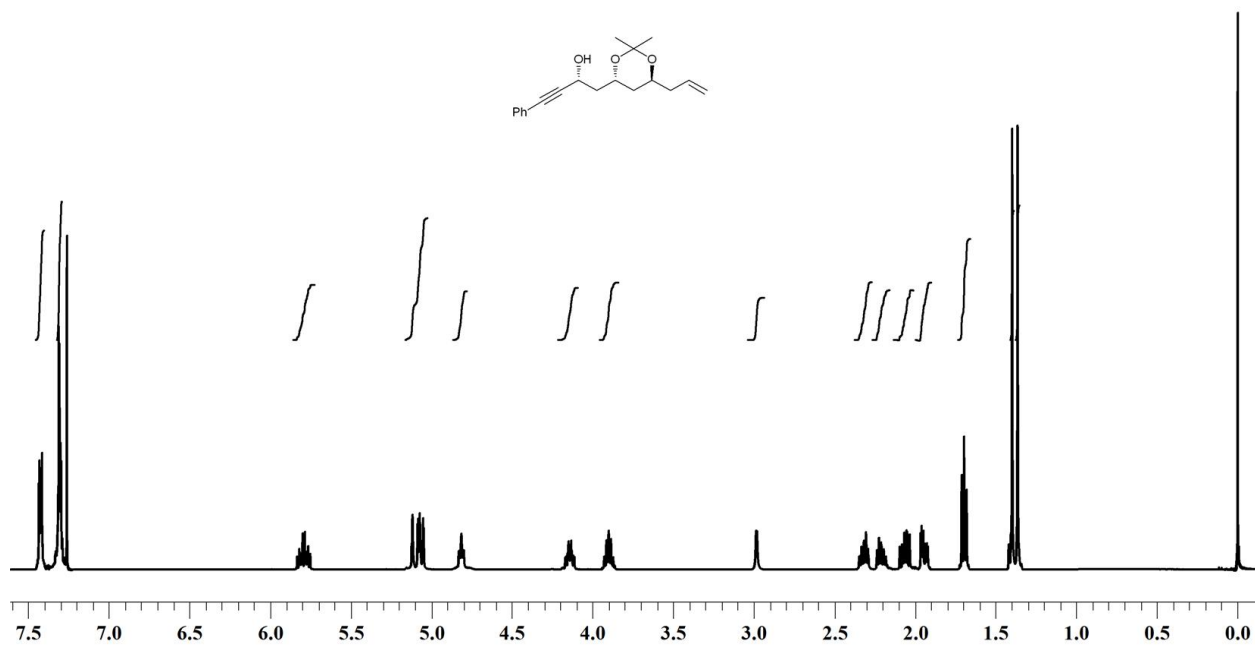

<sup>1</sup>H NMR OF COMPOUND 9

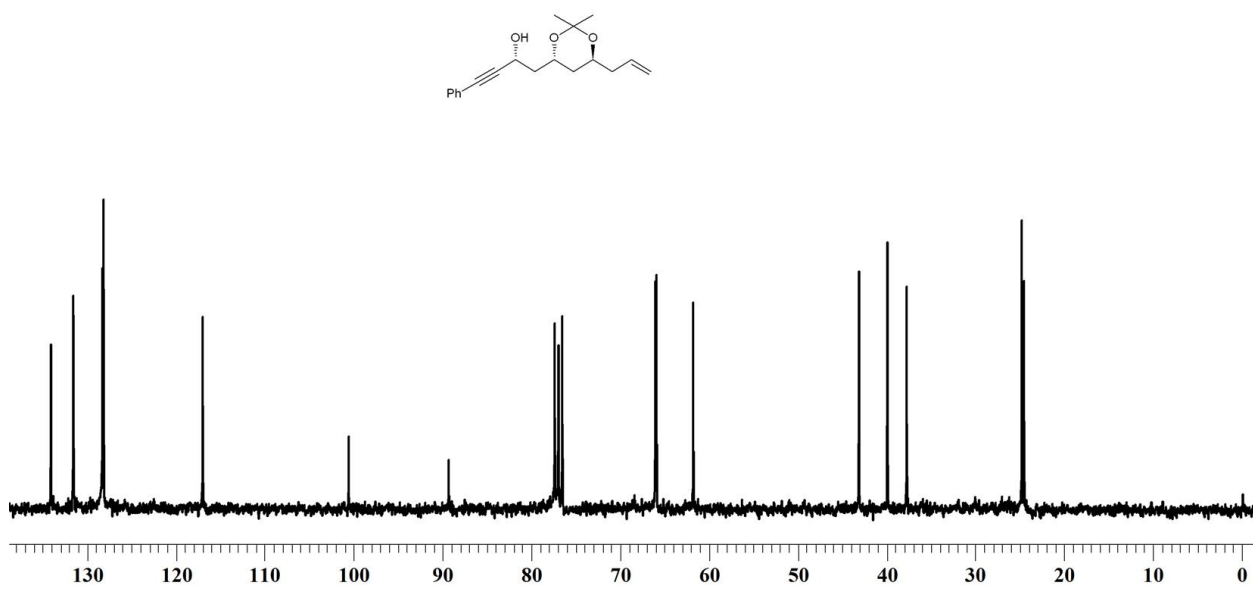

<sup>13</sup>C NMR OF COMPOUND 9

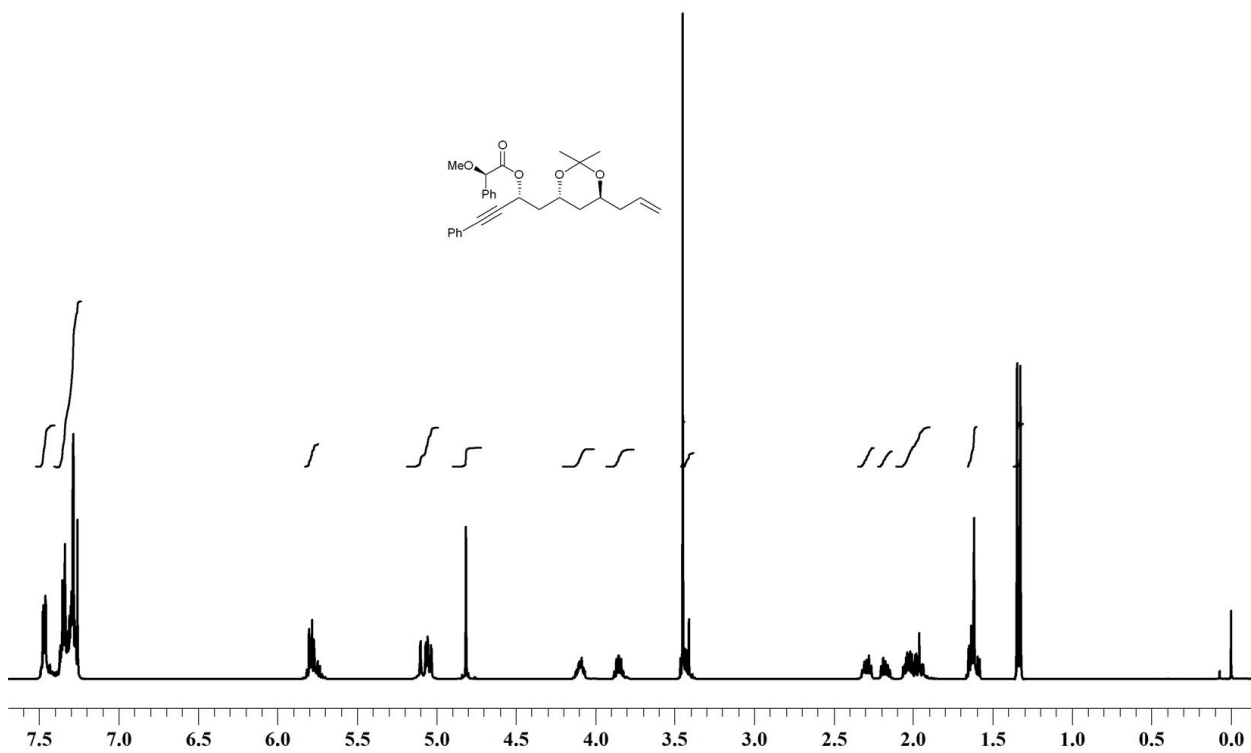

<sup>1</sup>H NMR OF (R)-MPA Ester

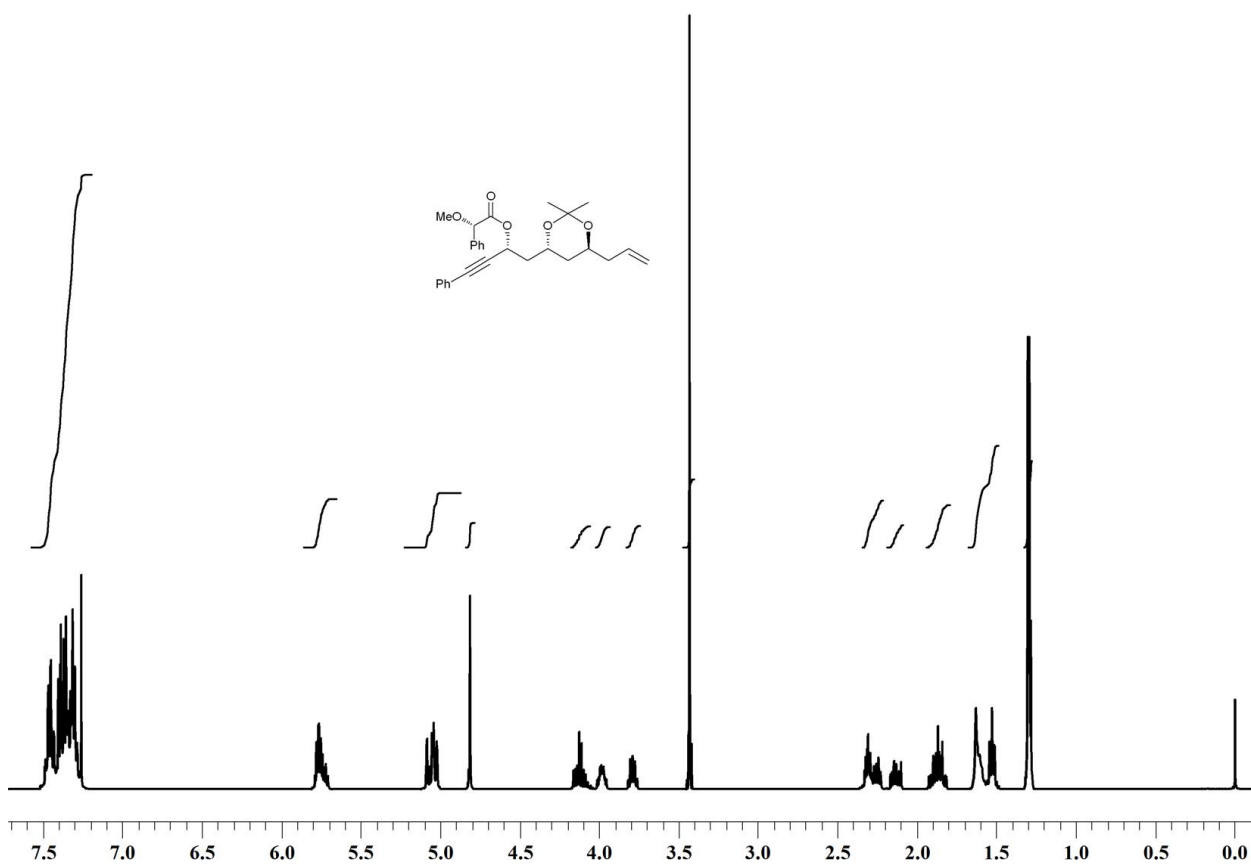

<sup>1</sup>H NMR OF (S)-MPA Ester

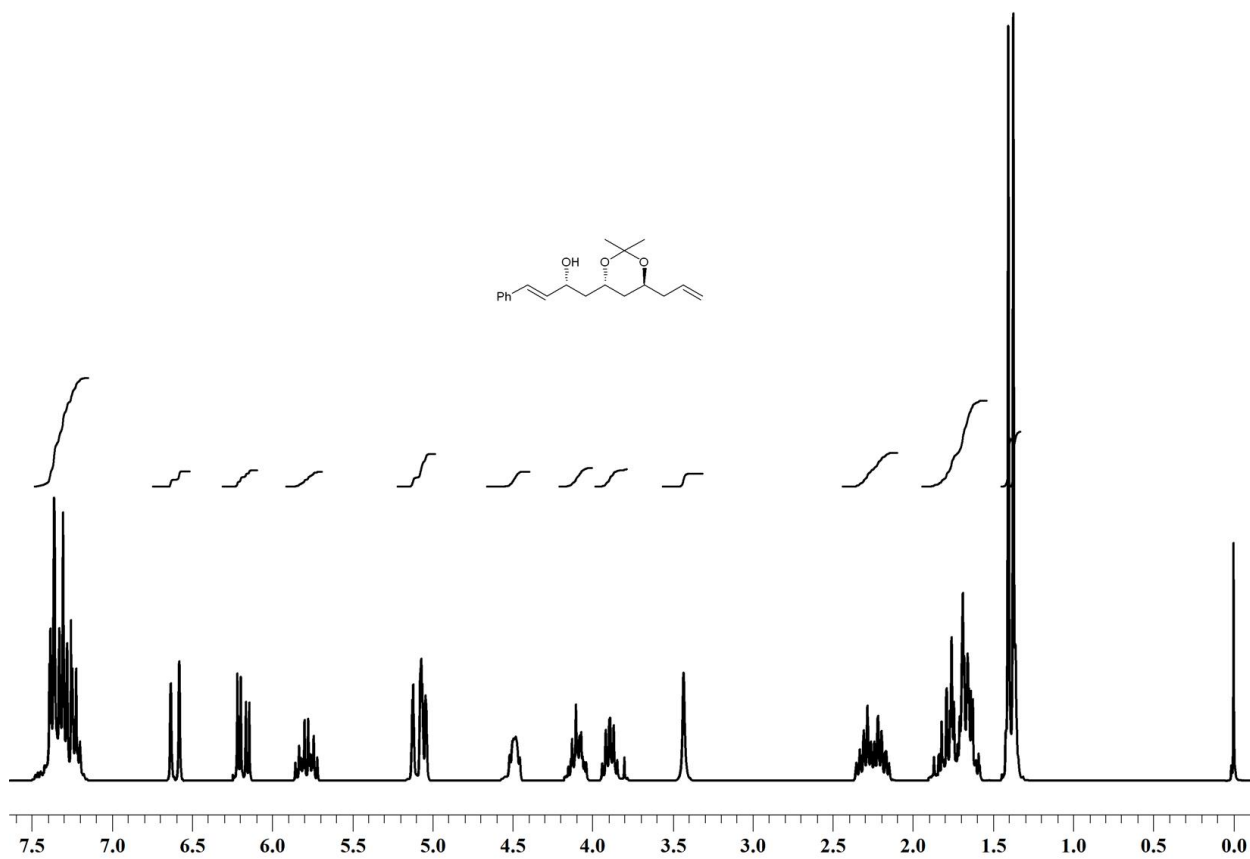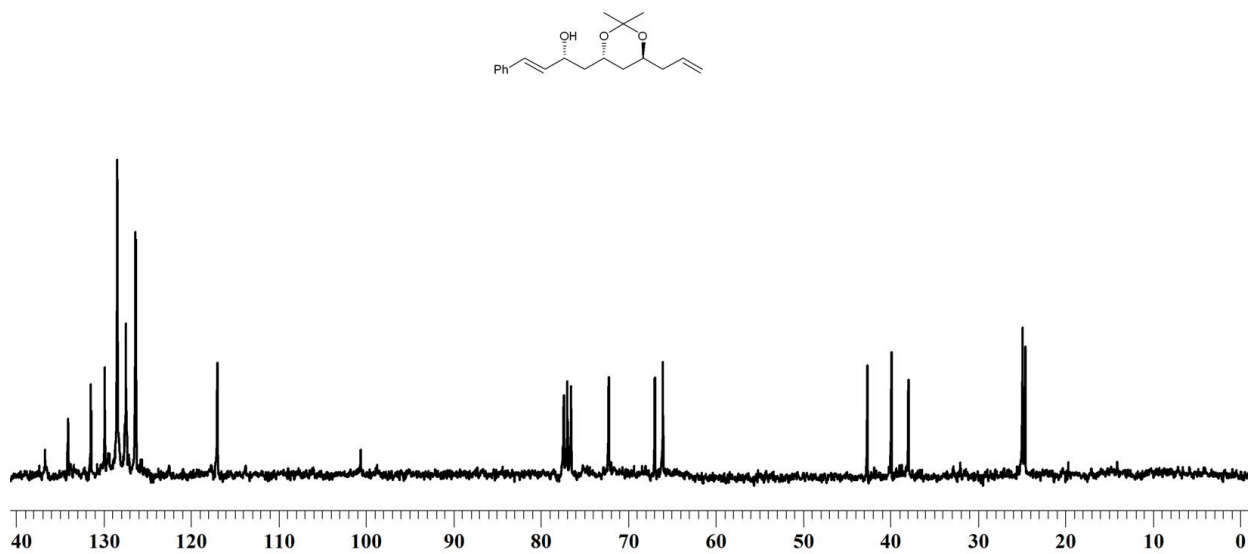

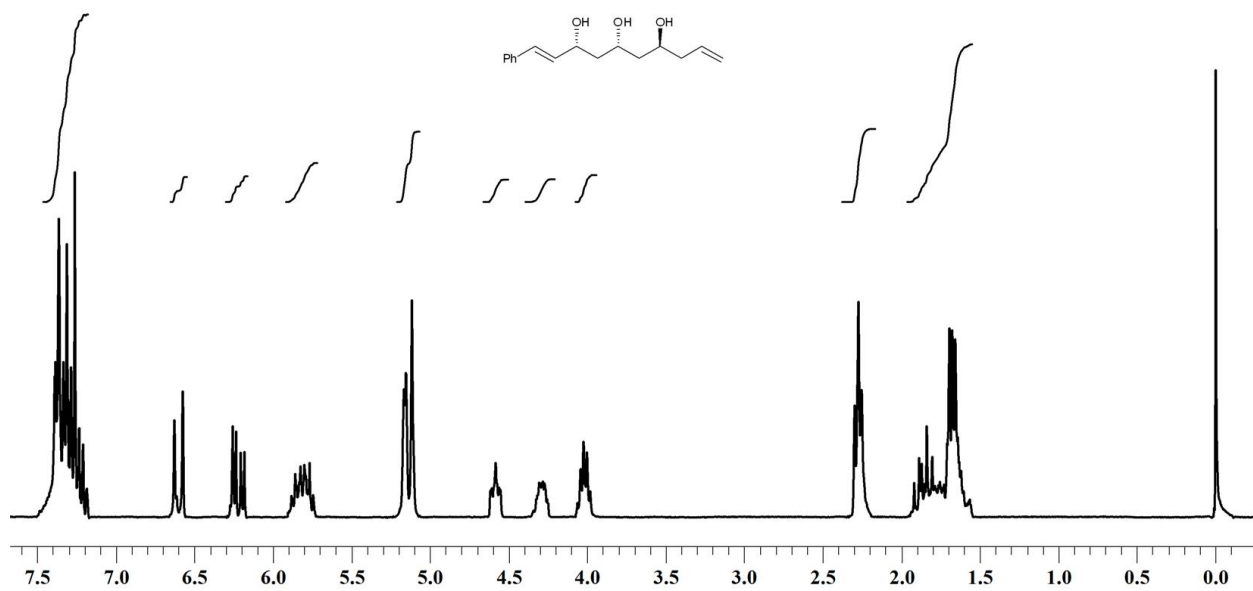

<sup>1</sup>H NMR OF COMPOUND 7

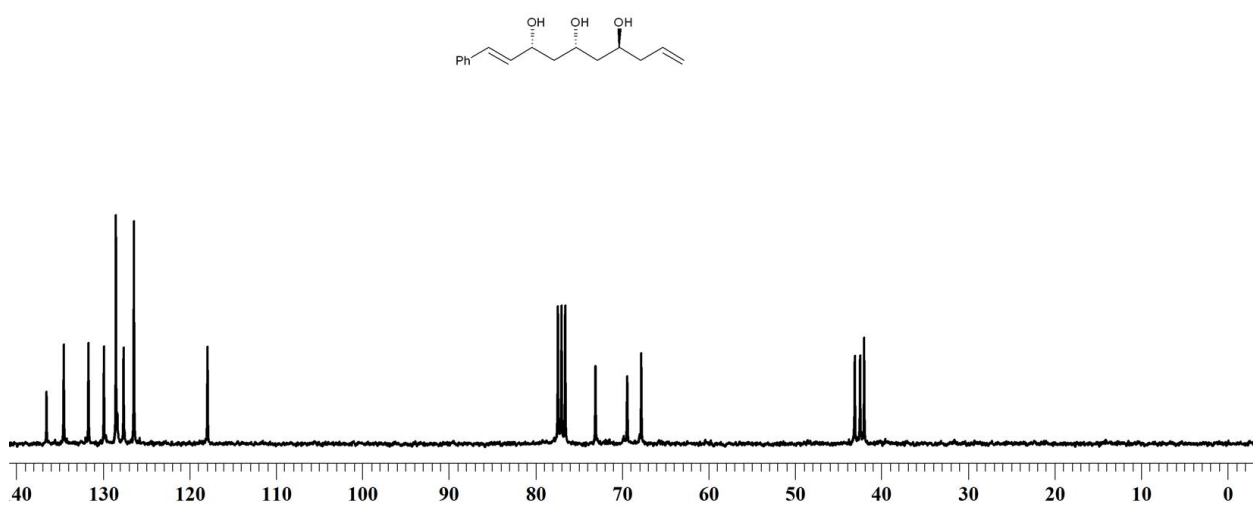

<sup>13</sup>C NMR OF COMPOUND 7

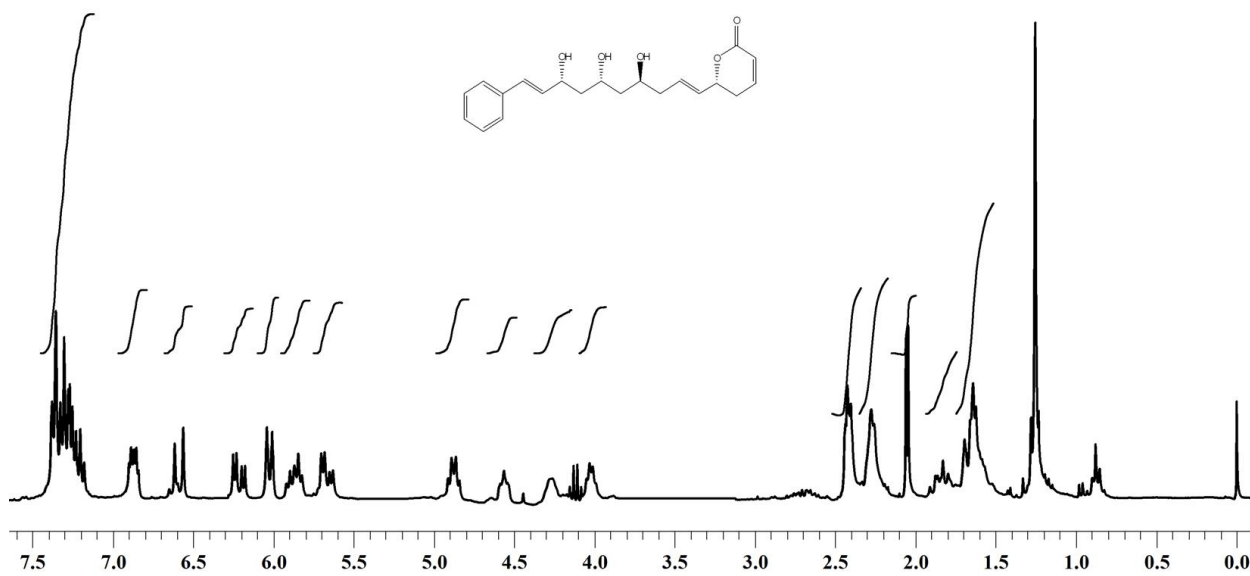

<sup>1</sup>H NMR OF COMPOUND 6

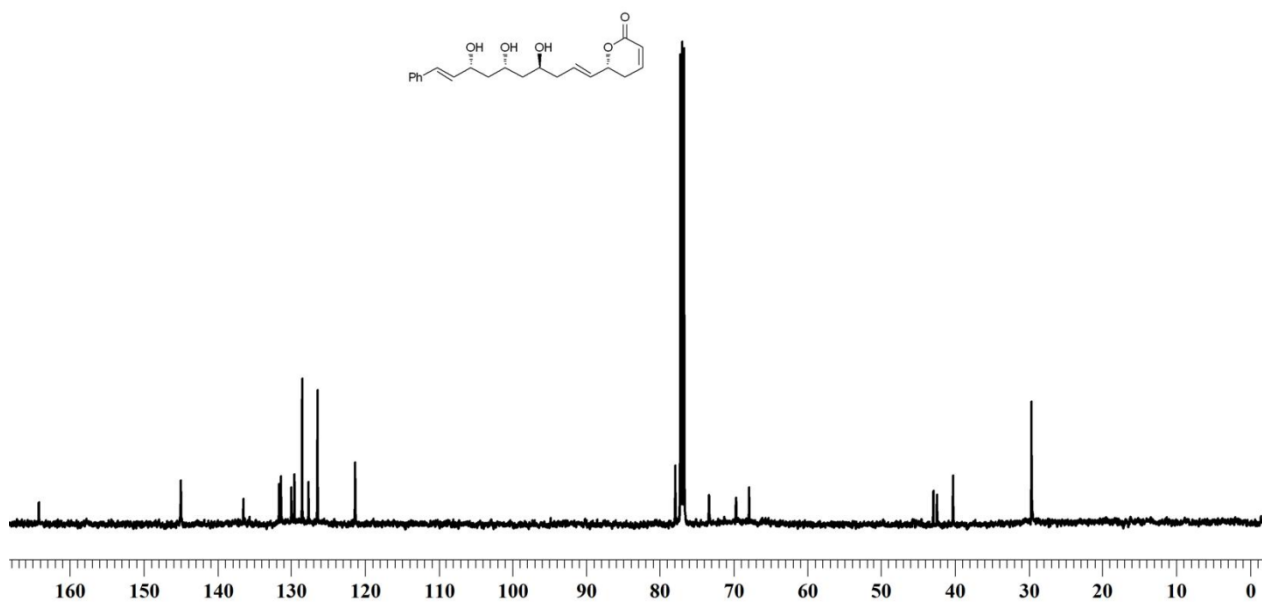

<sup>13</sup>C NMR OF COMPOUND 6

```

=====
Acq. Operator   : V.RAJESH                      Seq. Line :    1
Acq. Instrument : Instrument 1                  Location  : Vial 72
Injection Date  : 1/9/2015 12:02:00 PM        Inj       :    1
                                           Inj Volume: 10 µl

Acq. Method    : D:\METHODS\LCM.m
Last changed   : 1/9/2015 12:13:17 PM by V.RAJESH
Analysis Method : D:\METHODS\LCM.m
Last changed   : 1/9/2015 12:42:58 PM by V.RAJESH
Method Info    : COLUMN:ATLANTIS C18, 4.6 X 150MM, 5U
                MOBILEPHASE:90% ACN IN WATER(0.1% F.A)
                FLOWRATE:1ML/MIN
                DECTION:254NM
=====
  
```

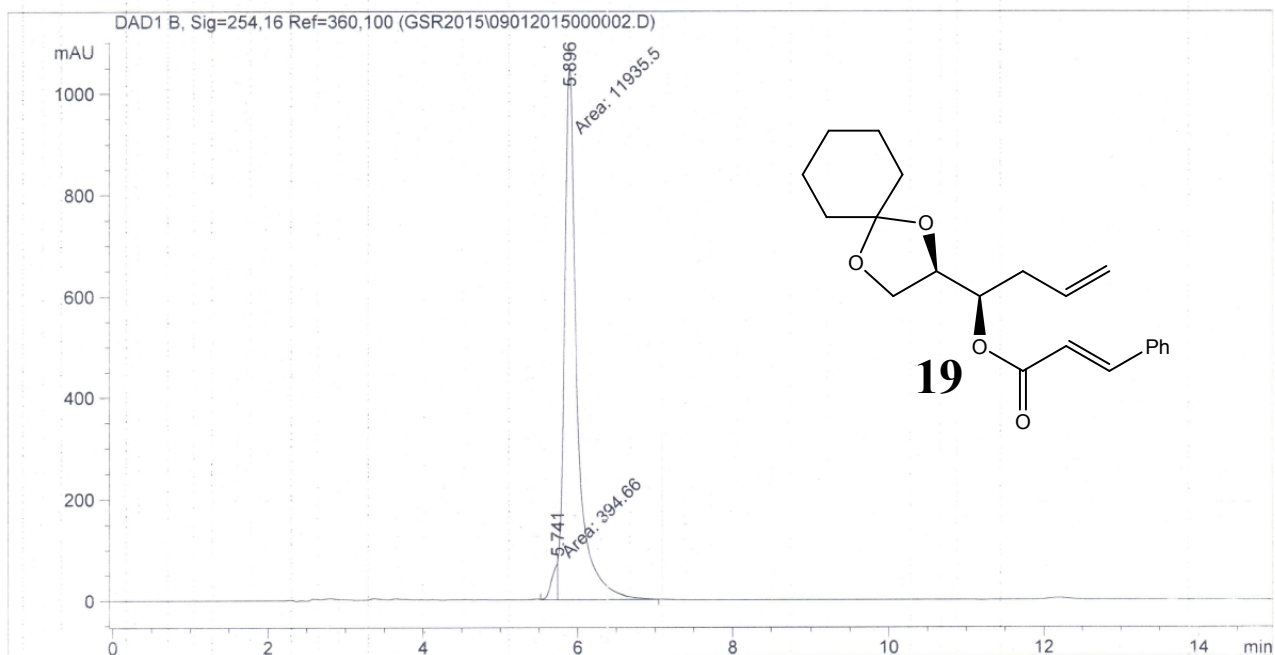

=====  
 Area Percent Report  
 =====

```

Sorted By      :      Signal
Multiplier     :      1.0000
Dilution       :      1.0000
Use Multiplier & Dilution Factor with ISTDs
  
```

Signal 1: DAD1 B, Sig=254,16 Ref=360,100

| Peak # | RetTime [min] | Type | Width [min] | Area [mAU*s] | Height [mAU] | Area %  |
|--------|---------------|------|-------------|--------------|--------------|---------|
| 1      | 5.741         | MF   | 0.0867      | 394.66037    | 75.86333     | 3.2008  |
| 2      | 5.896         | FM   | 0.1895      | 1.19355e4    | 1049.91235   | 96.7992 |

Totals :                    1.23301e4   1125.77568

=====  
 \*\*\* End of Report \*\*\*



# Display Report - Selected Window Selected Analysis

**Analysis Name:** 09012015000002.D  
**Method:** LCM.M  
**Sample Name:** 342  
**Analysis Info:**

**Instrument:** LC-MSD-Trap-SL  
**Operator:** SARMA

**Print Date:** 1/9/2015 12:44:28 PM  
**Acq. Date:** 1/9/2015 12:02:54 PM

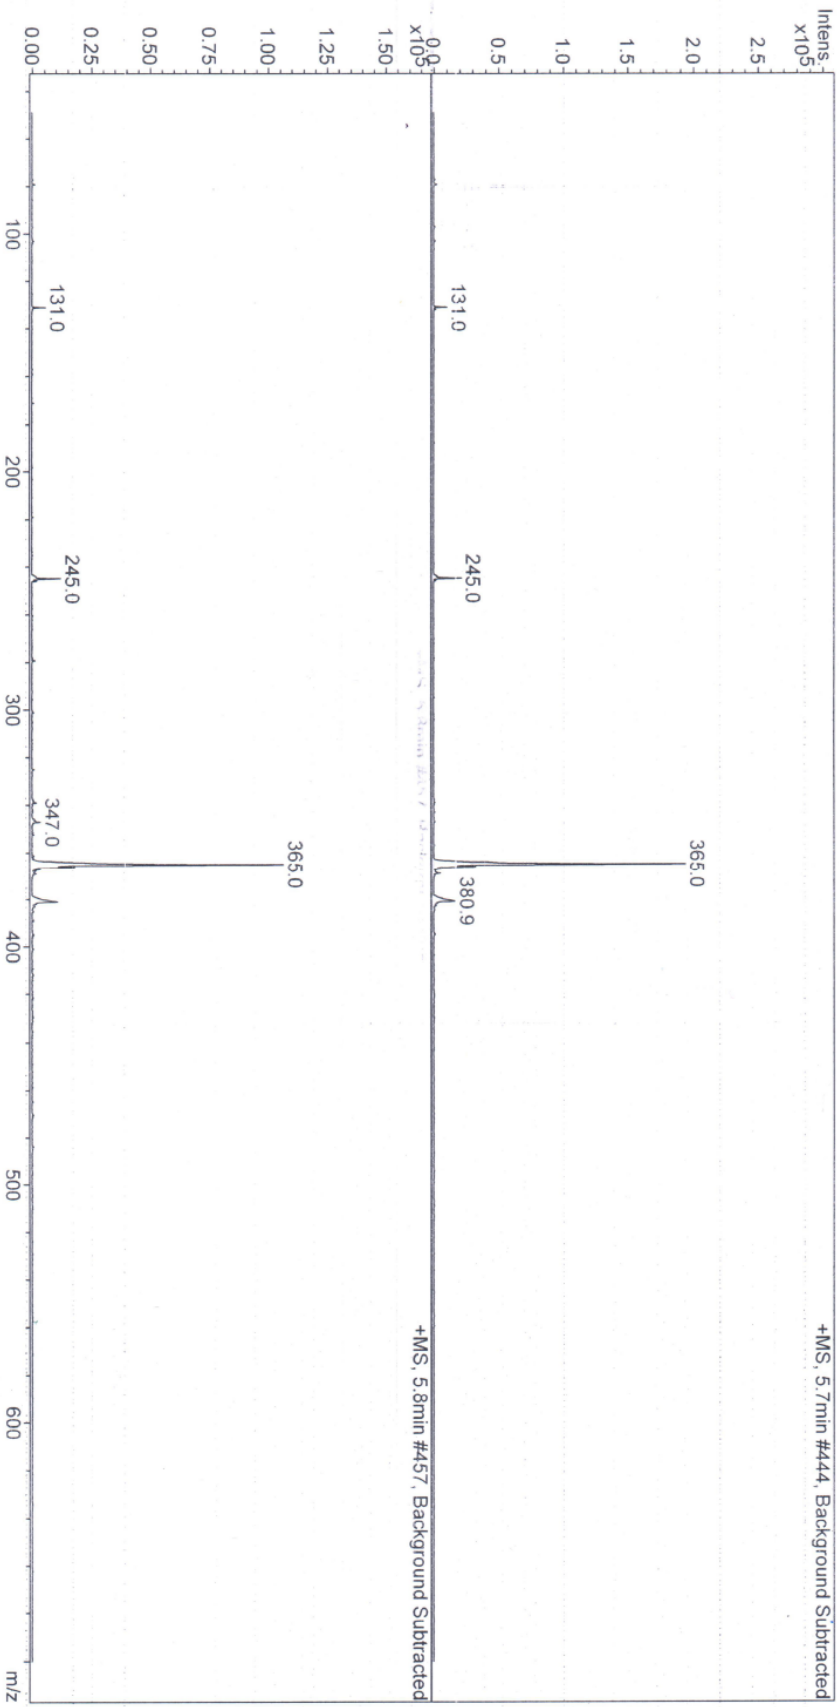

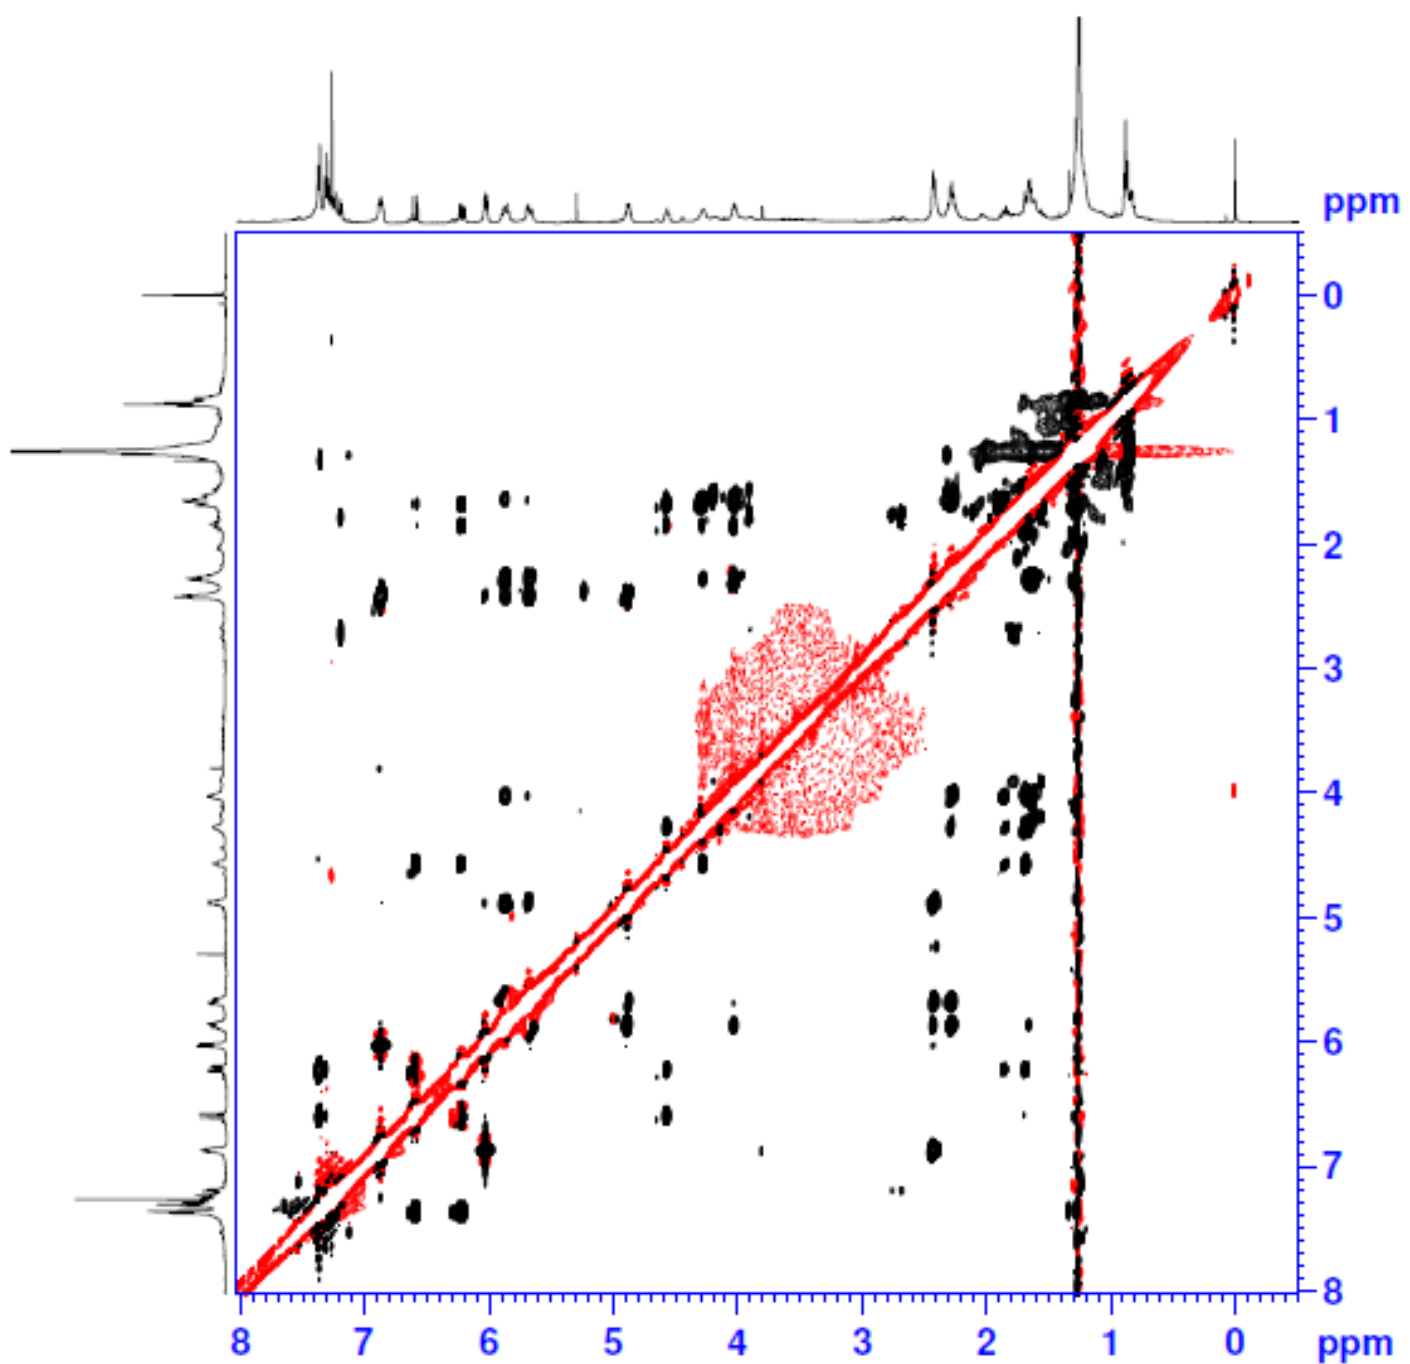

**Figure 3.** NOESY spectrum showing the characteristic NOE correlations of compound 6.
